# Supplementary material
Source: PubMed Central journal article supplement (PMC3556942)
Supplement: neo1501_0095SD1.pdf [file neo1501_0095SD1.pdf]

**Table W1.** Selected Characteristics of Participants in REDUCE and CAPS.

| Characteristic*              | REDUCE <sup>†</sup>        |                                             |                                        | CAPS                            |                              |
|------------------------------|----------------------------|---------------------------------------------|----------------------------------------|---------------------------------|------------------------------|
|                              | All [ <i>N</i> = 3239 (%)] | Non-cases in Placebo [ <i>N</i> = 1244 (%)] | Cases in Placebo [ <i>N</i> = 410 (%)] | Controls [ <i>N</i> = 1722 (%)] | Cases [ <i>N</i> = 2899 (%)] |
| Age (years)                  |                            |                                             |                                        |                                 |                              |
| Mean ± SD                    | 62.76 ± 6.00               | 62.22 ± 6.01                                | 63.52 ± 5.98                           | 67.14 ± 7.39                    | 66.37 ± 7.14                 |
| Range                        | 49–76                      | 49–76                                       | 50–76                                  | 45–80                           | 45–82                        |
| <63                          | 1561 (48.19)               | 639 (51.37)                                 | 185 (45.12)                            | 547 (31.77)                     | 998 (34.43)                  |
| ≥63                          | 1678 (51.81)               | 605 (48.63)                                 | 225 (54.88)                            | 1175 (68.23)                    | 1901 (65.57)                 |
| tPSA level (ng/ml)           |                            |                                             |                                        |                                 |                              |
| Median (Q1–Q3)               | 5.7 (4.4–7.2)              | 5.7 (4.3–7.2)                               | 5.7 (4.7–7.4)                          | 1.45 (0.78–2.92)                | 12.0 (7.0–34.0)              |
| <2.5                         | 8 (0.25)                   | 4 (0.32)                                    | 0                                      | 1204 (69.96)                    | 57 (2.03)                    |
| 2.5–3.9                      | 529 (16.37)                | 220 (17.74)                                 | 50 (12.22)                             | 234 (13.60)                     | 91 (3.23)                    |
| 4.0–10.0                     | 2677 (82.85)               | 1011 (81.53)                                | 358 (87.53)                            | 230 (13.36)                     | 1082 (38.45)                 |
| >10.0                        | 17 (0.53)                  | 5 (0.40)                                    | 1 (0.24)                               | 53 (3.08)                       | 1584 (56.29)                 |
| Missing                      | 8                          | 4                                           | 1                                      | 1                               | 79                           |
| fPSA level (ng/ml)           |                            |                                             |                                        |                                 |                              |
| Median (Q1–Q3)               | 0.9 (0.7–1.2)              | 0.9 (0.7–1.2)                               | 0.9 (0.6–1.2)                          | 0.45 (0.27–0.79)                | 0.31 (0.03–1.21)             |
| <0.70                        | 799 (24.74)                | 302 (24.37)                                 | 103 (25.18)                            | 1222 (71.01)                    | 1828 (63.19)                 |
| 0.70–0.89                    | 718 (22.23)                | 296 (23.89)                                 | 93 (22.74)                             | 147 (8.54)                      | 135 (4.67)                   |
| 0.90–1.20                    | 1043 (32.29)               | 398 (32.12)                                 | 134 (32.76)                            | 131 (7.61)                      | 203 (7.02)                   |
| >1.20                        | 670 (20.74)                | 243 (19.613)                                | 79 (19.32)                             | 221 (12.84)                     | 727 (25.13)                  |
| Missing                      | 9                          | 5                                           | 1                                      | 1                               | 6                            |
| %fPSA (%)                    |                            |                                             |                                        |                                 |                              |
| Median (Q1–Q3)               | 16.0 (12.5–20.0)           | 16.0 (12.5–19.79)                           | 15.52 (11.63–18.87)                    | 31.1 (23.4–40.3)                | 15.5 (10.85–23.2)            |
| <10.0                        | 330 (10.22)                | 109 (8.80)                                  | 65 (15.89)                             | 27 (1.55)                       | 460 (20.68)                  |
| 10.0–25.0                    | 2679 (82.94)               | 1044 (84.26)                                | 320 (78.24)                            | 496 (28.49)                     | 1291 (58.05)                 |
| >25.0                        | 221 (6.84)                 | 86 (6.94)                                   | 24 (5.87)                              | 1218 (69.96)                    | 473 (21.27)                  |
| Missing                      | 9                          | 5                                           | 1                                      | 5                               | 651                          |
| Prostate cancer <sup>‡</sup> |                            |                                             |                                        |                                 |                              |
| Nonaggressive (%)            | 286 (69.76)                | 1619 (56.81)                                |                                        |                                 |                              |
| Aggressive (%)               |                            |                                             | 124 (30.24)                            |                                 | 1231 (43.19)                 |

\*Age, tPSA and fPSA levels, and %fPSA were measured at baseline for REDUCE, at recruitment for CAPS controls, and at diagnosis for CAPS cases.

<sup>†</sup>Cases were prostate cancer patients newly diagnosed in the placebo group during a 4-year follow-up.

<sup>‡</sup>For REDUCE, those who developed a prostate tumor with a Gleason score of 7 or higher, stage T3b or higher, and/or lymph node or metastasis positive (N+ or M+, respectively) were defined as having an aggressive disease; for CAPS, patients were classified as having aggressive disease if their tumors had a clinical stage of T3/T4, N+, M+, Gleason score of 8 or higher, or a serum PSA level of >50 ng/ml; otherwise, the patients were classified as nonaggressive cases.

**Table W2.** Summary Results for Selected SNPs Associated with %fPSA in REDUCE GWAS and Replication in CAPS Controls with Intermediate tPSA Levels (2.5–10 ng/ml).

| Chromosome | SNP        | Position  | Major/Minor Allele | GWAS in REDUCE ( <i>N</i> = 3192) |                   |         |                       | Replication in CAPS ( <i>N</i> = 464) |                   |         |                       | <i>P</i> <sub>combined</sub> * |
|------------|------------|-----------|--------------------|-----------------------------------|-------------------|---------|-----------------------|---------------------------------------|-------------------|---------|-----------------------|--------------------------------|
|            |            |           |                    | MAF                               | Mean <sup>†</sup> | $\beta$ | <i>P</i> <sup>‡</sup> | MAF                                   | Mean <sup>†</sup> | $\beta$ | <i>P</i> <sup>‡</sup> |                                |
| 2          | rs1432302  | 122669620 | C/T                | 0.298                             | 16.13/16.83/17.19 | 0.042   | 6.42E–06              | 0.302                                 | 26.12/25.86/24.73 | –0.015  | 0.581                 | 3.96E–05                       |
| 7          | rs7456553  | 1210051   | T/C                | 0.380                             | 17.04/16.29/15.84 | –0.043  | 1.15E–06              | 0.384                                 | 26.27/25.11/27.17 | –0.010  | 0.697                 | 2.10E–06                       |
| 7          | rs10238880 | 26441399  | T/C                | 0.182                             | 16.85/15.94/15.06 | –0.052  | 4.06E–06              | 0.212                                 | 25.18/27.27/24.09 | 0.039   | 0.217                 | 8.82E–05                       |
| 12         | rs3213764  | 14478568  | A/G                | 0.467                             | 15.73/16.61/17.34 | 0.049   | 1.85E–08              | 0.504                                 | 23.85/26.22/27.15 | 0.065   | 9.65E–03              | 6.45E–10                       |
| 19         | rs1354774  | 56084930  | A/G                | 0.343                             | 15.64/17.14/17.45 | 0.058   | 7.39E–11              | 0.309                                 | 23.98/27.82/27.05 | 0.075   | 4.71E–03              | 1.25E–12                       |

\**P*<sub>combined</sub> values were estimated using inverse variance–weighted meta-analyses according to regression coefficients ( $\beta$ ) and corresponding SEs.

<sup>†</sup>Mean levels of %fPSA (%) by genotypes (major homozygote/heterozygote/minor homozygote).

<sup>‡</sup>*P* values were from linear regression models adjusted for age.

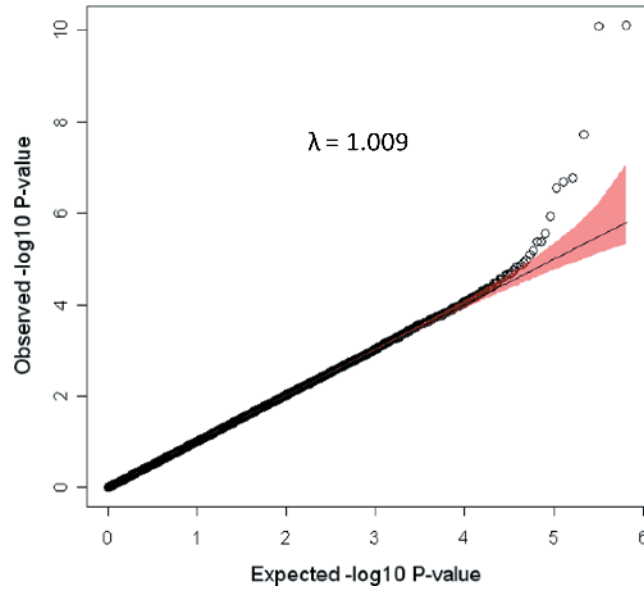

**Figure W1.** Q-Q plots and genomic inflation factors ( $\lambda$ ) for the associations with %fPSA, with observed  $P$  values plotted as a function of expected  $P$  values; red areas indicate the 90% confidence region from a null distribution of  $P$  values (generated from 100 simulations).

**Table W3.** Summary Results for Selected SNPs Associated with %fPSA in REDUCE GWAS and Replication in All of the CAPS Controls.

| Chromosome | SNP        | Position  | Major/Minor Allele | GWAS in REDUCE ( $N = 3192$ ) |                   |         |                | Replication in CAPS ( $N = 1722$ ) |                   |         |                | $P_{\text{combined}}^*$ |
|------------|------------|-----------|--------------------|-------------------------------|-------------------|---------|----------------|------------------------------------|-------------------|---------|----------------|-------------------------|
|            |            |           |                    | MAF                           | Mean <sup>†</sup> | $\beta$ | $P^{\ddagger}$ | MAF                                | Mean <sup>†</sup> | $\beta$ | $P^{\ddagger}$ |                         |
| 2          | rs1432302  | 122669620 | C/T                | 0.298                         | 16.13/16.83/17.19 | 0.042   | 6.42E-06       | 0.297                              | 32.37/32.62/32.58 | 0.005   | 0.730          | 4.99E-05                |
| 7          | rs7456553  | 1210051   | T/C                | 0.380                         | 17.04/16.29/15.84 | -0.043  | 1.15E-06       | 0.378                              | 32.61/32.27/32.74 | 0.001   | 0.936          | 3.65E-05                |
| 7          | rs10238880 | 26441399  | T/C                | 0.182                         | 16.85/15.94/15.06 | -0.052  | 4.06E-06       | 0.213                              | 32.43/32.69/31.48 | 0.007   | 0.691          | 2.56E-04                |
| 12         | rs3213764  | 14478568  | A/G                | 0.467                         | 15.73/16.61/17.34 | 0.049   | 1.85E-08       | 0.499                              | 31.21/32.85/33.02 | 0.032   | 0.023          | 1.97E-09                |
| 19         | rs1354774  | 56084930  | A/G                | 0.343                         | 15.64/17.14/17.45 | 0.058   | 7.39E-11       | 0.335                              | 29.77/34.50/35.34 | 0.101   | 1.05E-11       | 6.48E-20                |

\* $P_{\text{combined}}$  values were estimated using inverse variance-weighted meta-analyses according to regression coefficients ( $\beta$ ) and corresponding SEs.

<sup>†</sup>Mean levels of %fPSA (%) by genotypes (major homozygote/heterozygote/minor homozygote).

<sup>‡</sup> $P$  values were from linear regression models adjusted for age.

**Table W4.** SNPs at 12p13 and 19q13 Associated with %fPSA with a  $P$  Value Less than  $1 \times 10^{-5}$ .

| Chromosome                                 | SNP        | Position | Status    | Major/Minor Allele | MAF   | Mean*             | $\beta$ | SE    | $P^\dagger$ | LD with Lead SNP <sup>‡</sup> | $P$ Conditioned by Lead SNP <sup>§</sup> |
|--------------------------------------------|------------|----------|-----------|--------------------|-------|-------------------|---------|-------|-------------|-------------------------------|------------------------------------------|
| <b>SNPs at 12p13 associated with %fPSA</b> |            |          |           |                    |       |                   |         |       |             |                               |                                          |
| 12                                         | rs6488674  | 14380181 | Genotyped | G/T                | 0.459 | 15.92/16.49/17.36 | 0.041   | 0.009 | 2.70E-06    | 0.822                         | 0.534                                    |
| 12                                         | rs6488679  | 14412643 | Imputed   | T/G                | 0.493 | 15.84/16.50/17.34 | 0.043   | 0.009 | 9.73E-07    | 0.745                         | 0.881                                    |
| 12                                         | rs7137532  | 14415239 | Imputed   | T/G                | 0.493 | 15.85/16.51/17.35 | 0.043   | 0.009 | 1.02E-06    | 0.745                         | 0.871                                    |
| 12                                         | rs7312042  | 14424757 | Imputed   | A/G                | 0.490 | 15.85/16.46/17.34 | 0.043   | 0.009 | 9.38E-07    | 0.747                         | 0.826                                    |
| 12                                         | rs11055956 | 14425693 | Imputed   | A/G                | 0.490 | 15.83/16.48/17.35 | 0.044   | 0.009 | 5.72E-07    | 0.746                         | 0.696                                    |
| 12                                         | rs11055960 | 14427933 | Imputed   | T/G                | 0.447 | 15.92/16.56/17.41 | 0.042   | 0.009 | 1.93E-06    | 0.905                         | 0.149                                    |
| 12                                         | rs10734875 | 14433808 | Imputed   | G/A                | 0.489 | 15.85/16.48/17.35 | 0.043   | 0.009 | 6.29E-07    | 0.747                         | 0.708                                    |
| 12                                         | rs7954210  | 14439581 | Imputed   | C/A                | 0.487 | 15.81/16.49/17.38 | 0.045   | 0.009 | 1.80E-07    | 0.773                         | 0.297                                    |
| 12                                         | rs7966054  | 14442292 | Imputed   | C/T                | 0.445 | 15.92/16.56/17.42 | 0.043   | 0.009 | 1.12E-06    | 0.907                         | 0.155                                    |
| 12                                         | rs7970587  | 14466726 | Genotyped | G/A                | 0.486 | 15.82/16.49/17.37 | 0.045   | 0.009 | 2.05E-07    | 0.746                         | 0.496                                    |
| 12                                         | rs2417349  | 14472716 | Imputed   | C/T                | 0.411 | 17.20/16.28/15.61 | -0.047  | 0.009 | 1.06E-07    | 0.617                         | 0.126                                    |
| 12                                         | rs3213764  | 14478568 | Genotyped | A/G                | 0.467 | 15.73/16.61/17.34 | 0.049   | 0.009 | 1.85E-08    | –                             | –                                        |
| 12                                         | rs10772782 | 14484110 | Imputed   | A/G                | 0.383 | 17.16/16.31/15.53 | -0.046  | 0.009 | 3.96E-07    | 0.564                         | 0.118                                    |
| 12                                         | rs7310929  | 14485169 | Genotyped | T/C                | 0.375 | 17.14/16.31/15.48 | -0.046  | 0.009 | 1.69E-07    | 0.527                         | 0.087                                    |
| 12                                         | rs7964899  | 14487023 | Imputed   | G/A                | 0.446 | 15.93/16.56/17.42 | 0.042   | 0.009 | 1.47E-06    | 0.908                         | 0.154                                    |
| 12                                         | rs7298685  | 14498988 | Genotyped | C/A                | 0.433 | 17.25/16.27/15.89 | -0.040  | 0.009 | 4.09E-06    | 0.520                         | 0.406                                    |
| 12                                         | rs12366507 | 14500066 | Imputed   | G/A                | 0.438 | 17.26/16.30/15.87 | -0.039  | 0.009 | 6.31E-06    | 0.531                         | 0.434                                    |
| 12                                         | rs962504   | 14501706 | Imputed   | G/A                | 0.448 | 15.91/16.54/17.42 | 0.043   | 0.009 | 1.03E-06    | 0.926                         | 0.278                                    |
| 12                                         | rs11055980 | 14502789 | Imputed   | C/T                | 0.450 | 15.86/16.54/17.42 | 0.045   | 0.009 | 4.52E-07    | 0.937                         | 0.575                                    |
| 12                                         | rs4764090  | 14503590 | Imputed   | A/G                | 0.450 | 15.86/16.54/17.42 | 0.045   | 0.009 | 4.38E-07    | 0.939                         | 0.548                                    |
| 12                                         | rs4237951  | 14515841 | Imputed   | A/C                | 0.413 | 17.21/16.31/15.63 | -0.046  | 0.009 | 2.15E-07    | 0.621                         | 0.128                                    |
| 12                                         | rs2900333  | 14545134 | Imputed   | C/T                | 0.372 | 17.16/16.27/15.44 | -0.049  | 0.009 | 6.51E-08    | 0.538                         | 0.048                                    |
| <b>SNPs at 19q13 associated with %fPSA</b> |            |          |           |                    |       |                   |         |       |             |                               |                                          |
| 19                                         | rs198972   | 56071705 | Genotyped | G/A                | 0.296 | 15.84/17.25/16.97 | 0.048   | 0.009 | 2.78E-07    | 0.519                         | 0.499                                    |
| 19                                         | rs16987929 | 56077065 | Genotyped | A/G                | 0.240 | 15.92/17.29/17.70 | 0.065   | 0.010 | 7.90E-11    | 0.591                         | 0.020                                    |
| 19                                         | rs8103659  | 56077214 | Imputed   | A/G                | 0.235 | 15.92/17.30/17.74 | 0.065   | 0.010 | 1.35E-10    | 0.593                         | 0.040                                    |
| 19                                         | rs198957   | 56081372 | Imputed   | C/T                | 0.341 | 15.63/17.19/17.36 | 0.057   | 0.009 | 1.81E-10    | 1.000                         | –                                        |
| 19                                         | rs198956   | 56082165 | Imputed   | A/G                | 0.342 | 15.63/17.18/17.36 | 0.057   | 0.009 | 1.83E-10    | 1.000                         | –                                        |
| 19                                         | rs7256586  | 56082621 | Imputed   | C/A                | 0.238 | 15.93/17.28/17.77 | 0.066   | 0.010 | 6.51E-11    | 0.614                         | 0.018                                    |
| 19                                         | rs1354774  | 56084930 | Genotyped | A/G                | 0.343 | 15.64/17.14/17.45 | 0.058   | 0.009 | 7.39E-11    | –                             | –                                        |
| 19                                         | rs2739482  | 56086098 | Imputed   | C/T                | 0.343 | 15.64/17.14/17.39 | 0.057   | 0.009 | 2.28E-10    | 1.000                         | –                                        |
| 19                                         | rs61044983 | 56088734 | Imputed   | G/T                | 0.238 | 15.93/17.27/17.77 | 0.065   | 0.010 | 7.77E-11    | 0.617                         | 0.019                                    |
| 19                                         | rs8105985  | 56089883 | Imputed   | C/A                | 0.238 | 15.93/17.27/17.77 | 0.065   | 0.010 | 7.77E-11    | 0.617                         | 0.019                                    |
| 19                                         | rs1629856  | 56090700 | Imputed   | A/C                | 0.343 | 15.64/17.14/17.41 | 0.057   | 0.009 | 1.68E-10    | 1.000                         | –                                        |

\*Mean levels of %fPSA (%) by genotypes (major homozygote/heterozygote/minor homozygote).

<sup>†</sup> $P$  values were from linear regression models adjusted for age.

<sup>‡</sup>The  $r^2$  values were presented as a measure of LD for each SNP at 12p13 or 19q13 with rs3213764 or rs1354774, respectively.

<sup>§</sup> $P$  values were from linear regression models adjusted for age and conditioned by rs3213764 at 12p13 or rs1354774 at 19q13.

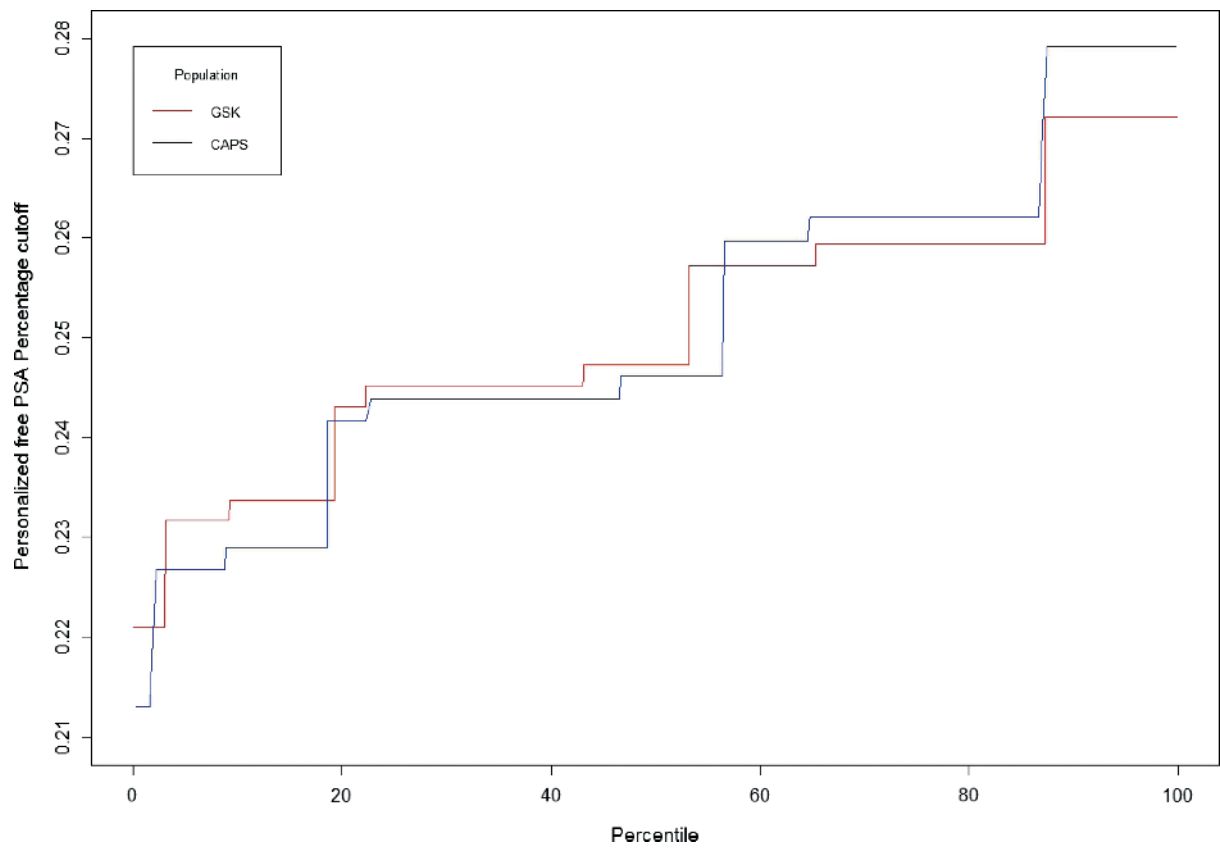

**Figure W2.** Cumulative distribution of the personalized %fPSA cutoff values after genetic correction. Personalized %fPSA cutoff values (shown on the Y-axis) were estimated by using a genetic correction for the two %fPSA-associated SNPs (rs3213764 and rs1354774) to the commonly used %fPSA cutoff value of 0.25 in the GSK (red line) and CAPS (blue line) study populations. The X-axis represents the percentile of the population.
